# Supplementary material for: Polymorphisms of a Disintegrin and Metalloproteinase with Thrombospondin Motifs 5 and Aflatoxin B1–Related Hepatocellular Carcinoma
Source: Oxford University Press journal article supplement (doi:10.1158/1055-9965.epi-15-0774), 2015-12-16
Supplement: 10559965epi150774-sup-152710_2_supp_3219296_nxj01n.doc [file 10559965epi150774-sup-152710_2_supp_3219296_nxj01n.doc]

**Supplementary Materials and Methods**

***Study population***

The protocol was approved by the Ethic Committees of the hospitals involved in this study. This is a hospital-based case-control study conducted in the affiliated hospitals of Guangxi Medical University and Youjiang Medical College for Nationalities in the Southwestern Guangxi, an important AFB1 exposure area. Details regarding the AFB1-related HCC study, including the recruitment of study subjects, data collection, and descriptive information about the subjects in this study, have been previously described (1, 2). Briefly, all cases were patients diagnosed with histopathologically confirmed HCC in the aforementioned hospitals from January 2004 to July 2014. Both case and control recruitment is still ongoing. Control individuals without clinic evidence of hepatic diseases or tumors were recruited from the general-health check-up center of the same hospitals during the same period. To control the effects of confounders, cases were individually matched (1:1 or 1:2) to controls based on gender, ethnicity (Han, Minority), age (±5 years), and hepatitis B virus (HBV) and hepatitis C virus (HCV) infection. Every potential control was first surveyed by using a short question questionnaire to elicit willingness to participate in the study and provide preliminary demographic data for matching. In this study, a total of 1706 cases and 2,076 controls, representing 95% of eligible cases and 98% of eligible controls, were enrolled and interviewed. Among these subjects, we randomly selected 200-matched cases and controls to form the screening set and the remaining patients formed the validation set.

***Data and sample collection***

Informed consent was obtained from each participant before inclusion in the study. Subject evaluation included a structured interview that elicited information on demographic characteristics (including age, race, detailed medical history for themselves and their families, food-consumption history, and migration history); collection of study samples; and a standardized clinical examination. At the same time, 4 ml of peripheral blood was obtained for the analysis of AFB1 exposure and SNP genotypes. Surgically removed tumor samples of all cases were collected for TP53M and ADAMTS5 protein expression assay. In addition, analyzing the levels of ADAMTS5 mRNA expression, we also collected 207 fresh cancer tissue specimens according to our published criteria(2). Clinical pathological data, including cirrhosis, tumor size, portal vein tumor (PVT), tumor stage, and medical treatment information, were obtained through the patients’ medical records. In this study, HBV and HCV infection status was ascertained by the hepatitis B surface antigen (HBsAg) and anti-HCV, respectively. Edmondson and Steiner grading system was used to evaluate the differentiation status of HCC in this study. Liver cirrhosis was diagnosed by pathological examination and tumor stages were confirmed according to the tumor-nodes-metastasis staging system. Additionally, to evaluate the role of postoperative transarterial chemoembolization (TACE) on hepatectomy in patients with different ADAMTS5 genotypes, we collected all corresponding TACE treatment information of cases. In this study, TACE consisted of an injection containing a mixture of chemotherapeutic agents and lipiodol followed by embolization with gelatin foam or polyvinyl alcohol until complete stasis was achieved in the tumor-feeding vessels. The chemotherapeutic agents used concurrently included epirubicin, cisplatin and fluorouracil.

For survival analysis, we followed all HCC cases and more detailed follow-up information was described in our previous studies(2). Briefly, all patients underwent serial monitoring every 2 months for the first 2 years and semiannually thereafter for detection of any recurrence. In this study, the last follow-up day was set on December 31, 2014, and survival status was ascertained by means of clinic records and patient or family contact. We defined the duration of the recurrence-free survival (RFS) as from the date of curative treatment to the date of tumor recurrence or last known date alive. The duration of the duration of overall survival (OS) was defined as from the date of curative treatment to the date of death or last known date alive.

***SNP Selection and genotyping***

We obtained 1143 single nucleotide polymorphisms in the ADAMTS5 gene by using the application programming interface tools in the ENSEMBL database (http://asia.ensembl.org/index.html). According to the criteria of minor allele frequency more than 0.10 in Asians, 74 of these SNPs were selected for the further analysis in the first-stage study (Supporting Table S1). Genotyping was performed by using SNaPshot method (Applied Biosystems [ABI], Foster City, CA), according to the manufacturers’ instructions. For SNP genotypic analyses, the controls and cases were genotyped at the same time, and duplicate test samples and two water samples (PCR negative controls) were included in each 96-well plate, with the technician blinded to the identity of the samples. The rate of concordant results in 200 duplicate samples was > 99%. In the second-stage study, four significant SNPs (rs2830581, rs162499, rs233895, and rs62215997) were genotyped by the TaqMan polymerase chain reaction (TaqMan-PCR) assays using the ABI 7900 System. Each PCR was carried out in a total volume of 5 μL consisting of 1 × TaqMAN Universal Master Mix II (cat#4440041, ABI), 0.2 μM of each probe and each primer (ABI), and 10 – 20 ng of genomic DNA. The PCR program had an initial denaturation step of 10 min at 95 °C followed by 40 cycles of 15 sec at 95 °C and 1 min at 60 °C. For quality control, controls were included in each run, and repeated genotyping and sequencing of a random 5% subset yielded 100% identical genotypes.

***ADAMTS5 mRNA-expressing analysis***

Total RNA was extracted from cancerous tissue using E.Z.M.A.TM MicroElute Total RNA Kit with DNase I (catalog#R6831-02, Omega Bio-tek, Inc., Norcross, GA, USA) and corresponding first-strand cDNA was synthesized using RevertAidTM First Strand cDNA Synthesis Kit (catalog#K1622, Fermentas Inc., Glen Burnie, MD, USA). The relative quantitation of ADAMTS5 mRNA-expressing levels using the comparative CT method (2-ΔΔCt method) was carried out by TaqMan-PCR (with an internal control UBC mRNA). PCR amplification was performed in a 25-µL final reaction mixture containing 1 × Premix Ex TaqTM (TaKaRa Biotechnology (Dalian) Co., Ltd., Dalian, China), 0.2 μM of each probe (ABI), 0.2 μM of each primer (ABI), and 1µL reverse transcription product with cDNAs. PCR reaction conditions comprised an initial step at 95 ℃ for 2 min, followed by 45 cycles at 95 ℃ for 10 sec and 60 ℃ for 1 min. Data analysis for the relative level of ADAMTS5 mRNA expression was performed with the iQTM Optical System software Version 2.0 (Bio-Rad).

***ADAMTS5 protein-expressing assay***

The expression levels of ADAMTS5 protein were analyzed by immunohistochemistry in tissue slides, as previously described(3). The corresponding anti-ADAMTS5 polyclonal antibody (dilution 1:500, catalog#sc-83186) and HRP-conjugated secondary antibody (catalog#KIT-9705) were obtained from Santa Cruz Biotechnology, Inc. (Santa Cruz, CA) and Maixin Biotechnology, Inc., respectively. In this study, ADAMTS5 protein-expressing levels were divided into three classifications: low (the immunoreactive score (IRS), < 4), medium (IRS, 4 - 8), and high (IRS, > 8), according to the value of IRS systems(4).

***The micro-vessel density (MVD) evaluation***

In this study, the angiogenesis of cancerous tissues was assessed using the immunohistochemistry staining of CD31 (cat#2011101101, Gene Tech (Shanghai) Company Limited, Shanghai, China). At × 200 magnification, vessel counts were made of all distinct brown staining endothelial cells in the cancerous regions over five fields in each slide. MVD was defined as the average value of the three readings. To analysis the relationship between ADAMTS5 polymorphism and angiogenesis in the cancerous tissues, the angiogenesis status was divided into two groups: low (≤ 50/×200 magnifications) and high (> 50/×200 magnifications), according to the mean MVD of cancerous-tissues vessels.

**Supplementary Reference**

1. Long XD, Zhao D, Wang C, Huang XY, Yao JG, Ma Y, et al. Genetic Polymorphisms in DNA Repair Genes XRCC4 and XRCC5 and Aflatoxin B1-related Hepatocellular Carcinoma. Epidemiology. 2013;24:671-81.

2. Long XD, Yao JG, Zeng Z, Ma Y, Huang XY, Wei ZH, et al. Polymorphisms in the coding region of X-ray repair complementing group 4 and aflatoxin B1-related hepatocellular carcinoma. Hepatology. 2013;58:171-81.

3. Long XD, Ma Y, Zhou YF, Ma AM, Fu GH. Polymorphism in xeroderma pigmentosum complementation group C codon 939 and aflatoxin B1-related hepatocellular carcinoma in the Guangxi population. Hepatology. 2010;52:1301-9.

4. Friedrichs K, Gluba S, Eidtmann H, Jonat W. Overexpression of p53 and prognosis in breast cancer. Cancer. 1993;72:3641-7.
